# Supplementary material for: Active-site-enriched dendritic crystal Co/Fe-doped Ni3S2electrocatalysts for efficient oxygen evolution reaction
Source: Royal Society of Chemistry journal article supplement (doi:10.1039/d3dt01071f), 2023-01-01
Supplement: d3dt01071f1.pdf [file d3dt01071f1.pdf]

## ***Supporting Information***

### **Active-sites-enriched dendritic crystal Co/Fe-doped Ni<sub>3</sub>S<sub>2</sub> electrocatalyst for efficient oxygen evolution reaction**

Yanan Cui, Chenxu Zhang, Yaxin Li, Zhengyan Du, Chong Wang, Shansheng Yu,  
Hongwei Tian\*, Weitao Zheng

*Key Laboratory of Automobile Materials MOE, School of Materials Science & Engineering and Jilin Provincial International Cooperation Key Laboratory of High-Efficiency Clean Energy Materials, Jilin University, Changchun 130012, China*

\*Corresponding author.

*E-mail address:* tianhw@jlu.edu.cn (H. Tian).

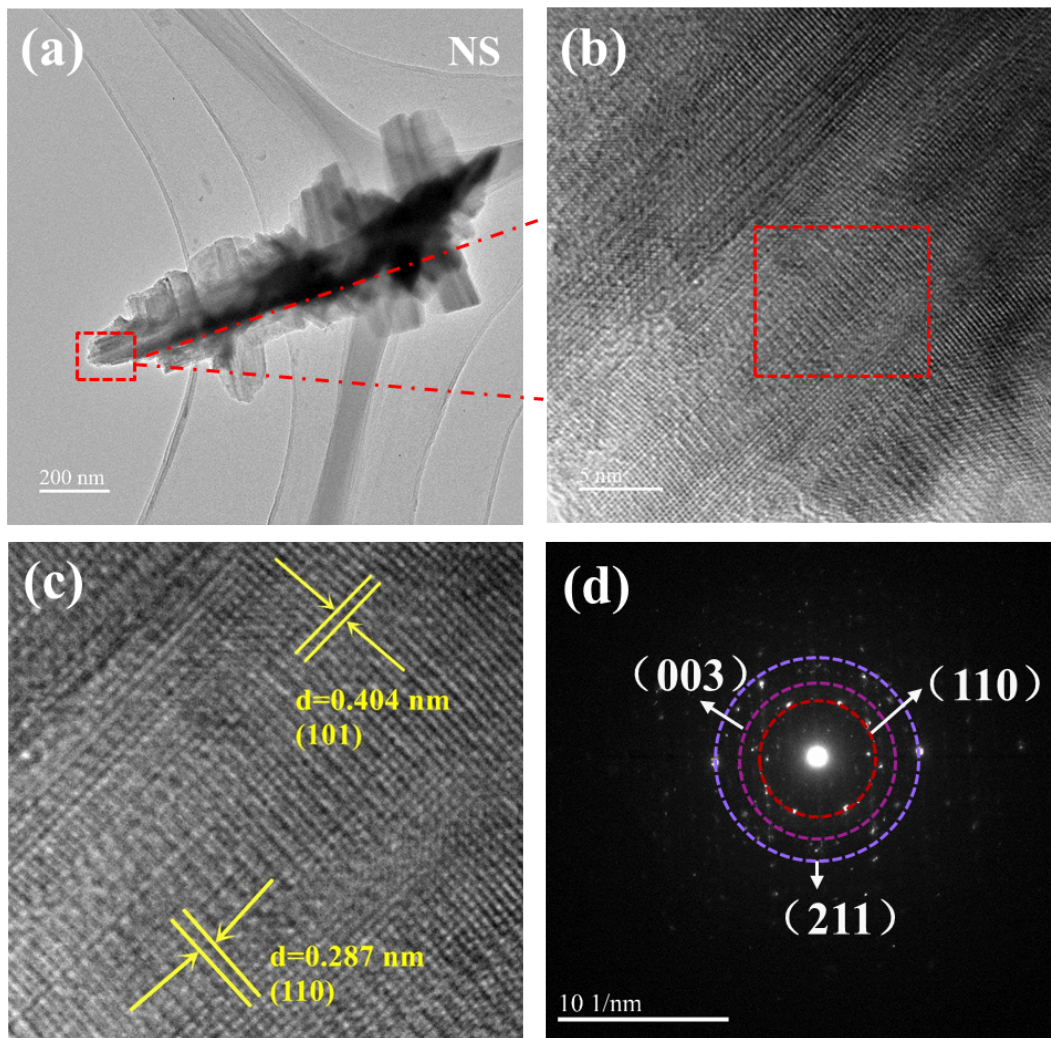

**Fig. S1.** (a-d) Low- and high-resolution TEM images of NS.

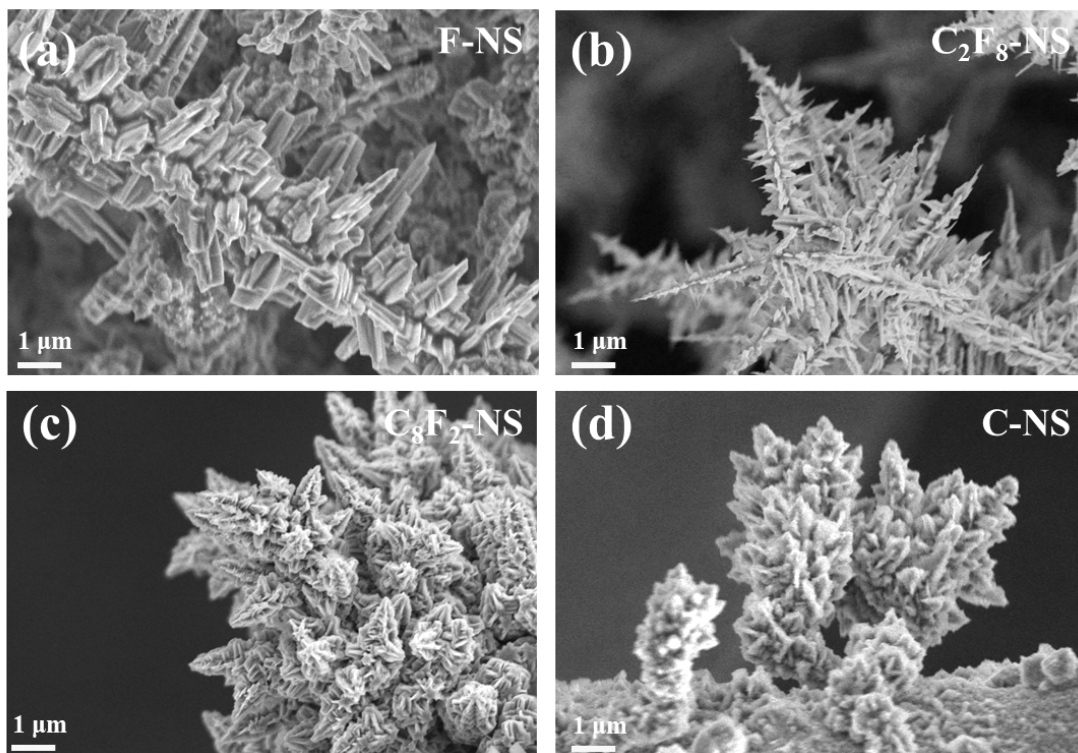

**Fig. S2.** (a-d) The SEM images of F-NS, C<sub>2</sub>F<sub>8</sub>-NS, C<sub>8</sub>F<sub>2</sub>-NS, and C-NS.

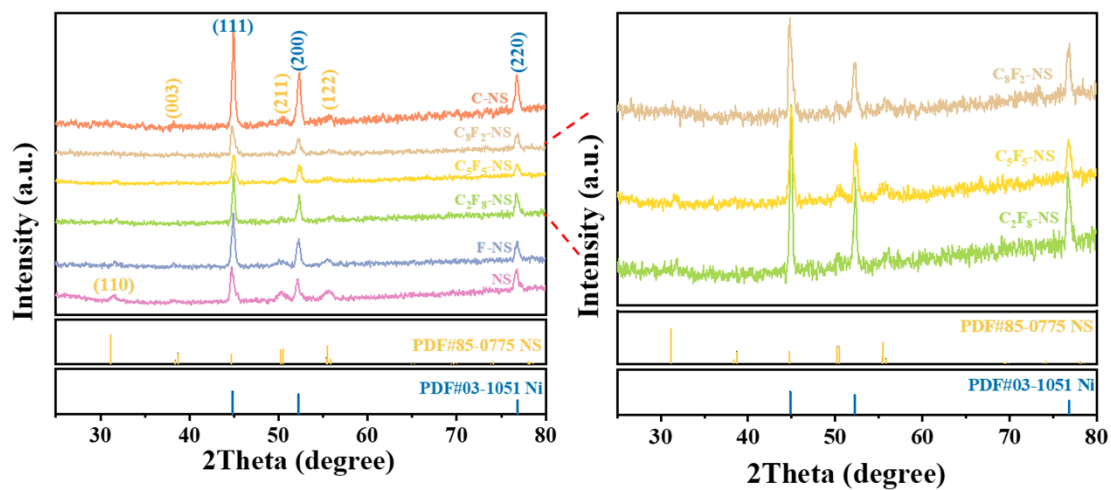

**Fig. S3.** XRD of NS, F-NS, C<sub>2</sub>F<sub>8</sub>-NS, C<sub>5</sub>F<sub>5</sub>-NS, C<sub>8</sub>F<sub>2</sub>-NS, and C-NS.

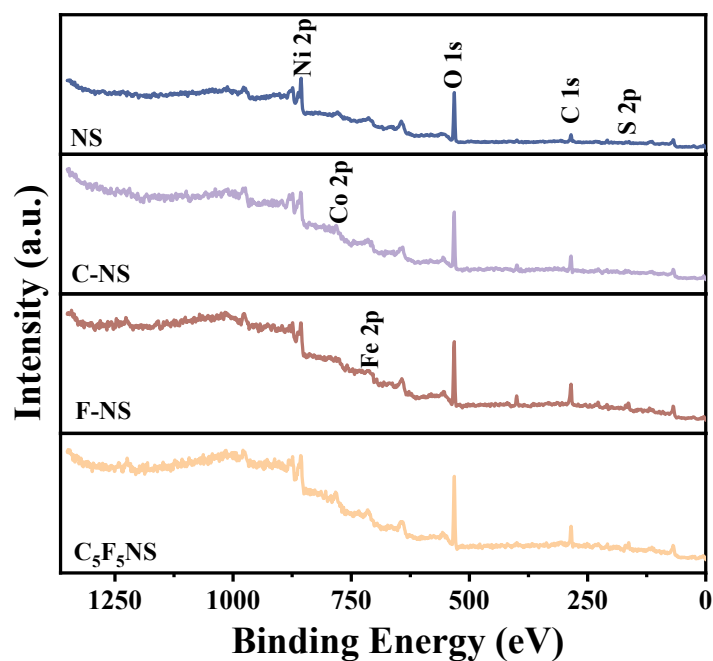

**Fig. S4.** XPS survey spectra of of NS, C-NS, F-NS, and  $C_5F_5$ -NS.

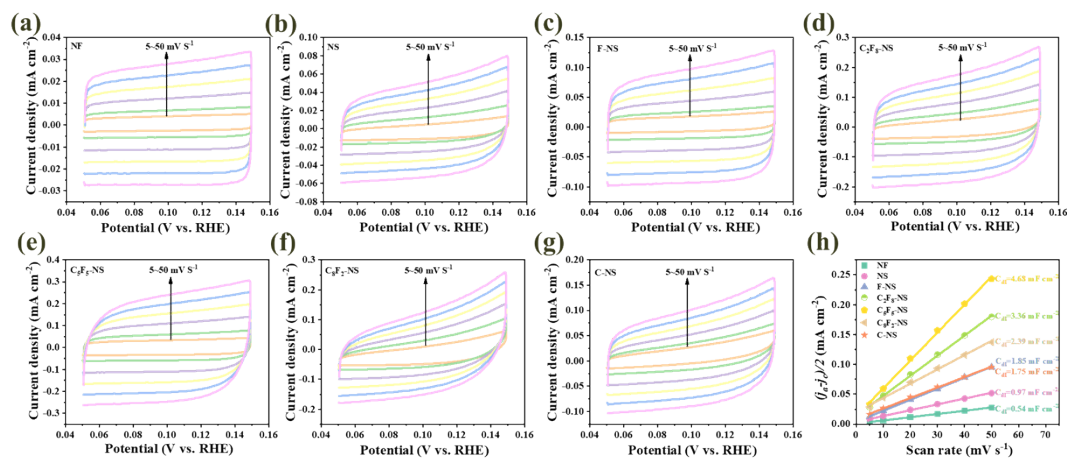

**Fig. S5.** (a-g) Cyclic voltammograms of NF, NS, F-NS,  $C_2F_8$ -NS,  $C_5F_5$ -NS,  $C_8F_2$ -NS, and C-NS. (h) Estimation of  $C_{dl}$  by plotting the current density variation vs. scan rate to fit a linear regression of NF, NS, F-NS,  $C_2F_8$ -NS,  $C_5F_5$ -NS,  $C_8F_2$ -NS, and C-NS.

The ECSA of the samples can be calculated by Eq. (S1) <sup>1</sup>:

$$\text{ECSA} = \frac{C_{\text{dl}}}{C_s} \cdot S \quad (\text{S1})$$

where  $S$  represents the geometric area of the working electrode (in this work,  $S = 1 \text{ cm}^2$ ) and  $C_s$  is the specific capacitance of the sample or the capacitance of an atomically smooth planar surface of the material per unit area under identical electrolyte conditions. We used general specific capacitances of  $C_s = 0.040 \text{ mF cm}^{-2}$  in 1 M KOH based on typical reported values <sup>2</sup>.

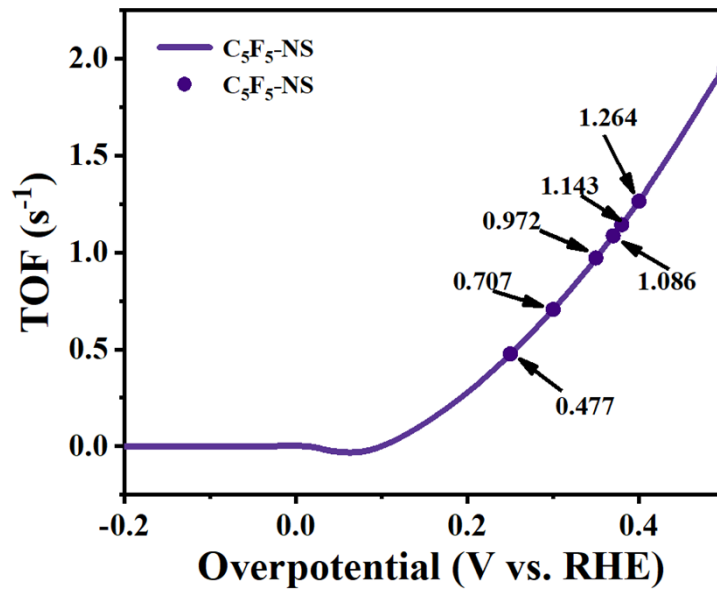

**Fig. S6.** The TOF values of  $\text{C}_5\text{F}_5\text{-NS}$ .

For OER, the TOF values can be obtained by Eq. (S2):

$$\text{TOF} = \frac{I}{4nF} \quad (\text{S2})$$

where  $I$  is the current during the LSV measurement in 1 M KOH solution,  $F$  is the Faraday constant, and  $n$  is the molar number of active sites for the electrocatalyst.  $n$  was obtained in 1 M PBS solution using the CV method (the potential range was -0.2 to 0.6 V (vs. RHE) and scan rate was 50 mV/s) <sup>3</sup>. With a given geometric area  $A$ , the

number of active sites “n” is proportional to the charge Q, which can be calculated from the obtained CV curve by integrating. Therefore, substituting  $I_{cv} = J_{cv} \cdot A$  and

$t = \frac{U_{cv}}{v}$ , we derived the following Eq. (S3) <sup>3</sup>:

$$Q = \frac{1}{2} \int d(I_{cv}t) = A/2v \int d(U_{cv}I_{cv}) = \frac{SA}{2v} \quad S3$$

Because the charge Q of surface active sites (n) can be described by  $Q = nF$ , therefore,

$$n = \frac{SA}{2vF} \quad S4$$

where  $I_{cv}$ ,  $J_{cv}$ ,  $U_{cv}$  are the current, current density, and potential obtained from CV curve, v is the scan rate (50 mV/s in this work), S is the integrated area of CV curve <sup>3</sup>.

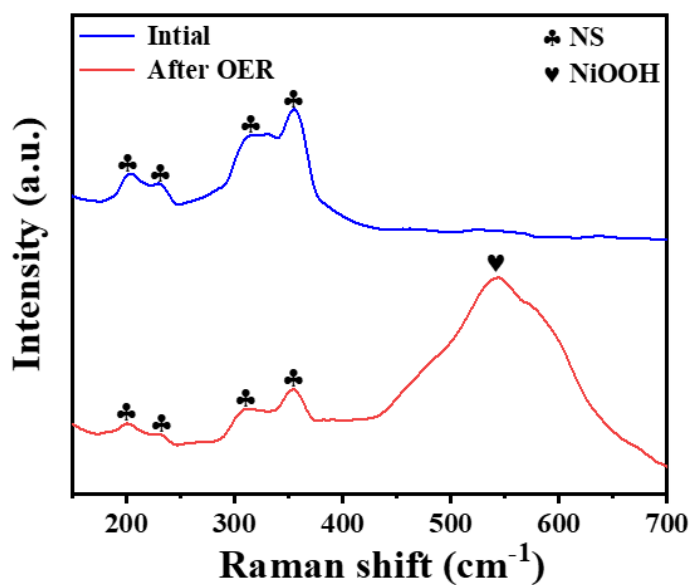

**Fig. S7.** Raman spectra of C<sub>5</sub>F<sub>5</sub>-NS before and after durability tests for OER.

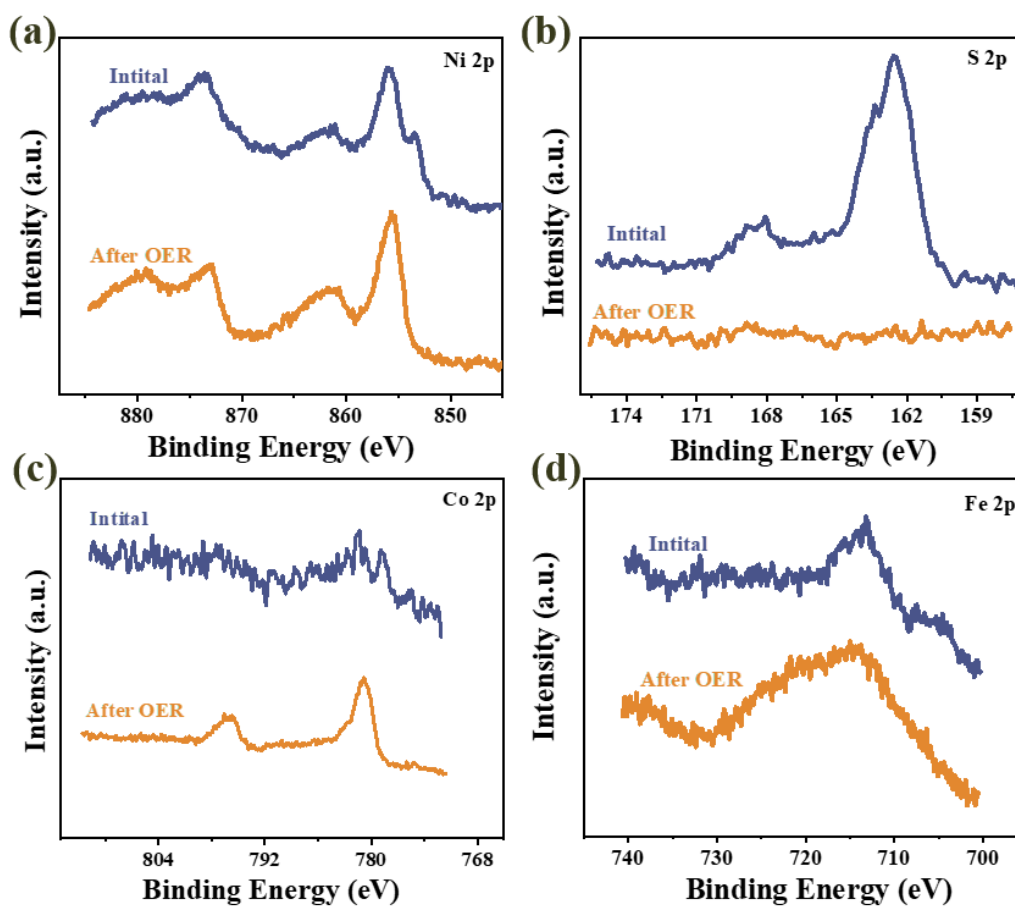

**Fig. S8.** (a) Ni 2p, (b) S 2p, (c) Co 2p and (d) Fe 2p high-resolution XPS spectra of C<sub>5</sub>F<sub>5</sub>-NS before and after durability tests for OER in the 1.0 M KOH electrolyte.

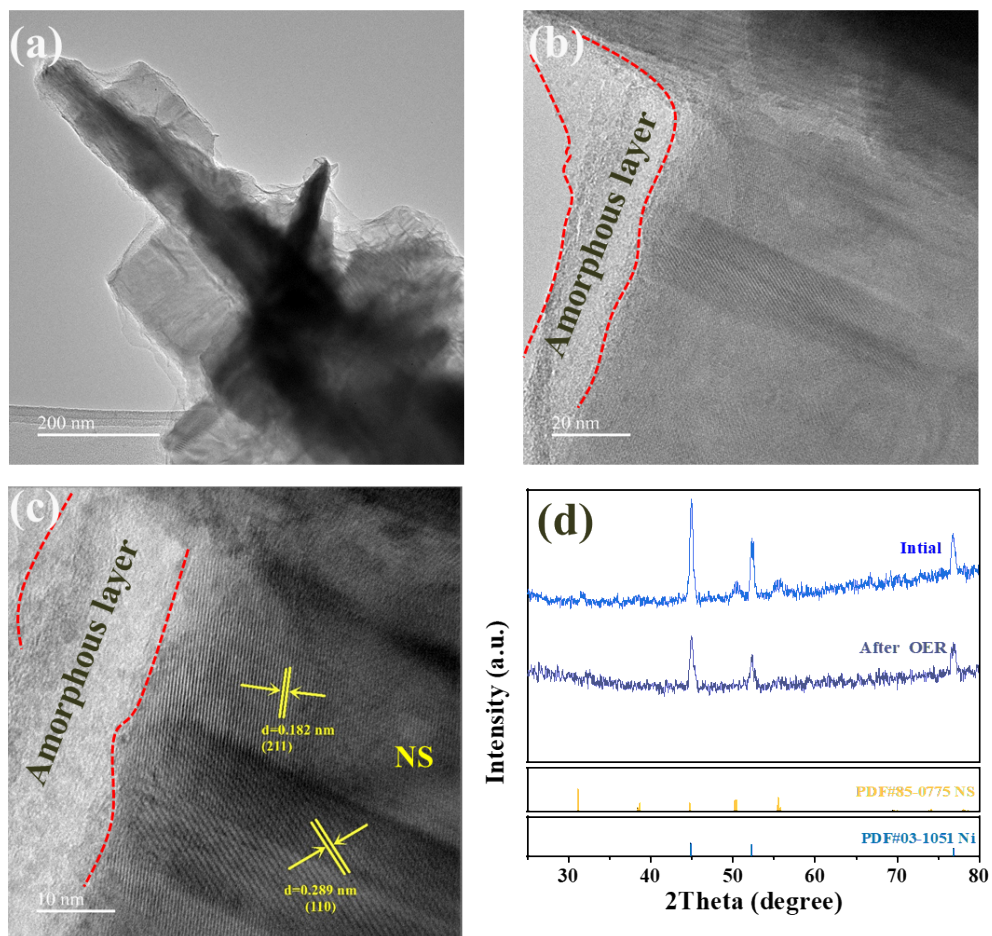

**Fig. S9.** (a-c) TEM images of  $C_5F_5$ -NS after durability tests and (d) XRD of  $C_5F_5$ -NS before and after durability tests for OER in the 1.0 M KOH electrolyte.

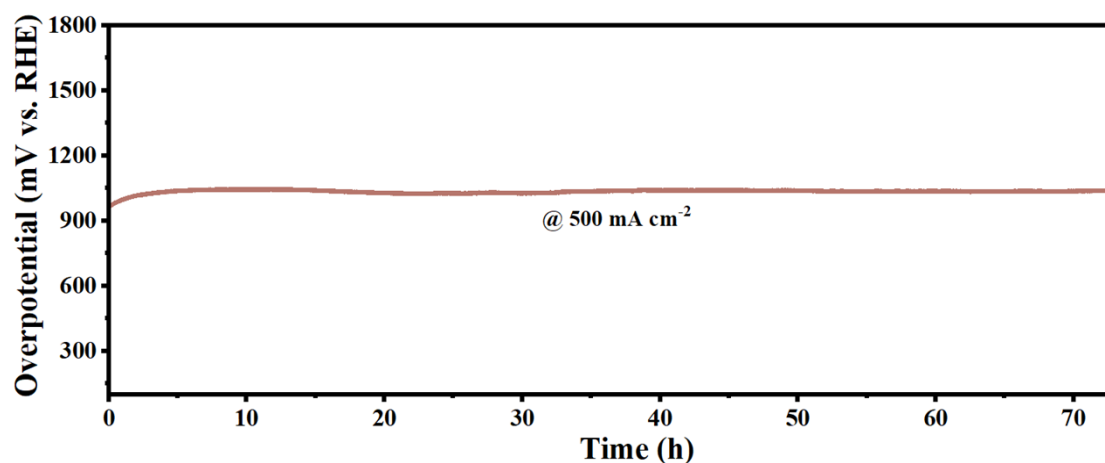

**Fig. S10.** The v-t curves at  $500 \text{ mA cm}^{-2}$  of  $C_5F_5$ -NS toward OER in 1.0 M KOH electrolyte.



**Table S1.** The element atomic content of the as-obtained electrocatalysts via ICP analysis.

| Catalysts                         | Ni (%) | Co (%) | Fe (%) |
|-----------------------------------|--------|--------|--------|
| C-NS                              | 59     | 12.6   | -      |
| F-NS                              | 58.5   | -      | 11.8   |
| C <sub>2</sub> F <sub>8</sub> -NS | 58     | 2.76   | 10.6   |
| C <sub>5</sub> F <sub>5</sub> -NS | 58.4   | 6.97   | 6.3    |
| C <sub>8</sub> F <sub>2</sub> -NS | 58.1   | 11     | 2.7    |

**Table S2.** The element atomic content of Ni<sup>3+</sup> in the as-obtained electrocatalysts via XPS analysis.

| Element          | NS (%) | C-NS (%) | F-NS (%) | C <sub>5</sub> F <sub>5</sub> -NS (%) |
|------------------|--------|----------|----------|---------------------------------------|
| Ni <sup>3+</sup> | 36.02  | 38.97    | 44.81    | 47.89                                 |

**Table S3.** The TOF values of the as-obtained C<sub>5</sub>F<sub>5</sub>-NS electrocatalyst for OER in comparison with reported electrocatalysts.

| Catalysts                                                                                      | TOF <sub>250</sub><br>(s <sup>-1</sup> ) | TOF <sub>300</sub><br>(s <sup>-1</sup> ) | TOF <sub>350</sub><br>(s <sup>-1</sup> ) | TOF <sub>370</sub><br>(s <sup>-1</sup> ) | TOF <sub>380</sub><br>(s <sup>-1</sup> ) | TOF <sub>400</sub><br>(s <sup>-1</sup> ) | References       |
|------------------------------------------------------------------------------------------------|------------------------------------------|------------------------------------------|------------------------------------------|------------------------------------------|------------------------------------------|------------------------------------------|------------------|
| <b>C<sub>5</sub>F<sub>5</sub>-NS</b>                                                           | <b>0.477</b>                             | <b>0.707</b>                             | <b>0.972</b>                             | <b>1.086</b>                             | <b>1.143</b>                             | <b>1.264</b>                             | <b>This work</b> |
| FeNi-1/2-600/Ni                                                                                | 0.11                                     | -                                        | -                                        | -                                        | -                                        | -                                        | 4                |
| CoCu-MOF NBs                                                                                   | -                                        | 0.326                                    | -                                        | -                                        | -                                        | -                                        | 5                |
| NiP <sub>c</sub> -NiFe <sub>x</sub> MOFs                                                       | -                                        | 0.194                                    | -                                        | -                                        | -                                        | -                                        | 6                |
| r-CoFe                                                                                         | -                                        | 0.151                                    | -                                        | -                                        | -                                        | -                                        | 7                |
| CoO-NiFe LDH/NF                                                                                | -                                        | -                                        | 0.590                                    | -                                        | -                                        | -                                        | 8                |
| Ni <sub>0.81</sub> Fe <sub>0.19</sub> O                                                        | -                                        | 0.100                                    | 0.480                                    | -                                        | -                                        | -                                        | 9                |
| Co <sub>0.5</sub> V <sub>0.5</sub> -COF-SO <sub>3</sub>                                        | -                                        | 0.098                                    | -                                        | -                                        | -                                        | -                                        | 10               |
| Hollow CoP OCHs                                                                                | -                                        | 0.072                                    | -                                        | -                                        | -                                        | -                                        | 11               |
| CoOOH                                                                                          | -                                        | 0.040                                    | -                                        | -                                        | -                                        | -                                        | 12               |
| Co-MnO <sub>2</sub> /MnCo <sub>2</sub> O <sub>4.5</sub>                                        | -                                        | 0.034                                    | -                                        | -                                        | -                                        | -                                        | 13               |
| NiO/Fe <sup>trace</sup>                                                                        | -                                        | 0.030                                    | -                                        | -                                        | -                                        | -                                        | 14               |
| α-Co <sub>4</sub> Fe(OH) <sub>x</sub>                                                          | -                                        | 0.027                                    | -                                        | -                                        | -                                        | -                                        | 15               |
| Co <sub>0.4</sub> Fe <sub>0.6</sub> LDH/<br>g-CN <sub>x</sub>                                  | -                                        | -                                        | 0.250                                    | -                                        | -                                        | -                                        | 16               |
| Pd <sub>180</sub>                                                                              | -                                        | -                                        | 0.200                                    | -                                        | -                                        | -                                        | 17               |
| β-Ni(OH) <sub>2</sub> ultrathin<br>nanomeshes                                                  | -                                        | -                                        | 0.078                                    | -                                        | -                                        | -                                        | 18               |
| NiP nanocoatings                                                                               | -                                        | -                                        | 0.05                                     | -                                        | -                                        | -                                        | 19               |
| Fe-NS                                                                                          | -                                        | -                                        | 0.021                                    | -                                        | -                                        | -                                        | 20               |
| {(Ni(L <sub>1</sub> )(TA)(H <sub>2</sub> O) <sub>2</sub> )·2<br>H <sub>2</sub> O} <sub>n</sub> | -                                        | -                                        | -                                        | 0.600                                    | -                                        | -                                        | 21               |
| Cr <sub>0.2</sub> Co <sub>1.8</sub> P/CB                                                       | -                                        | -                                        | -                                        | 0.585                                    | -                                        | -                                        | 22               |
| Co QD/rGO                                                                                      | -                                        | -                                        | -                                        | 0.181                                    | -                                        | -                                        | 23               |
| CoNi hydroxide UNSs                                                                            | -                                        | -                                        | -                                        | -                                        | 0.160                                    | -                                        | 24               |
| MWCNT-bpyRutpy                                                                                 | -                                        | -                                        | -                                        | -                                        | -                                        | 0.583                                    | 25               |
| Co <sub>3</sub> O <sub>3.87</sub> F <sub>0.13</sub>                                            | -                                        | -                                        | -                                        | -                                        | -                                        | 0.042                                    | 26               |
| EK-b                                                                                           | -                                        | -                                        | -                                        | -                                        | -                                        | 0.012                                    | 27               |

Note: TOF<sub>x</sub> (x = 250, 300, 350, 370, 380 and 400) represents the TOF at x mV.

**Table S4.** The OER activity of the as-obtained C<sub>5</sub>F<sub>5</sub>-NS electrocatalyst in comparison with reported electrocatalysts.

| Catalysts                                                                        | $\eta_{10}$<br>(mV) | Tafel slope<br>(mV dec <sup>-1</sup> ) | Stability (h) | References       |
|----------------------------------------------------------------------------------|---------------------|----------------------------------------|---------------|------------------|
| <b>C<sub>5</sub>F<sub>5</sub>-NS</b>                                             | <b>146</b>          | <b>26</b>                              | <b>86</b>     | <b>This work</b> |
| NiS/G                                                                            | 300                 | 55.8                                   | 72            | 28               |
| FeNi-1/2-600/Ni                                                                  | 200                 | 30                                     | 20            | 4                |
| FeS <sub>2</sub> /C                                                              | 291                 | 65.6                                   | 15            | 29               |
| Ni-P alloys                                                                      | 335                 | 70                                     | 12            | 19               |
| NF@NiMoCo                                                                        | 277                 | 87.0                                   | 24            | 30               |
| EK-b                                                                             | 378                 | 60                                     | 12            | 27               |
| Co <sub>9</sub> S <sub>8</sub> /NOSC-900                                         | 340                 | 68.0                                   | 10            | 31               |
| O-doped Co <sub>2</sub> P/CuO NWs/CF                                             | 270                 | 74.4                                   | 30            | 32               |
| Ni <sub>3</sub> S <sub>2</sub> /Ni                                               | 310                 | 80.1                                   | 30            | 33               |
| Ni <sub>3</sub> S <sub>2</sub> films                                             | 400                 | 51.0                                   | 24            | 34               |
| Ni <sub>3</sub> S <sub>2</sub> /NF                                               | 296                 | 65.1                                   | 50            | 35               |
| ANF/NW                                                                           | 382                 | 103.0                                  | 20            | 36               |
| MoS <sub>2</sub> /NiS <sub>2</sub>                                               | 278                 | 91.7                                   | 24            | 37               |
| ZnCo <sub>2</sub> S <sub>4</sub>                                                 | 278                 | 64.3                                   | 25            | 38               |
| MoS <sub>2</sub> /NiS                                                            | 350                 | 108.0                                  | 24            | 39               |
| Co-NC/Mo <sub>2</sub> C                                                          | 347                 | 61.0                                   | 20            | 40               |
| Ni <sub>12</sub> P <sub>5</sub> /Ni <sub>3</sub> (PO <sub>4</sub> ) <sub>2</sub> | 318                 | 51.7                                   | 10            | 41               |
| Fe <sub>7</sub> S <sub>8</sub>                                                   | 270                 | 43.0                                   | 24            | 42               |
| NiVB/rGO                                                                         | 267                 | 44.0                                   | 12            | 43               |
| 6-FP-Co-OMC-1                                                                    | 355                 | 67                                     | 11            | 44               |
| Co <sub>2</sub> P@Co <sub>3</sub> O <sub>4</sub>                                 | 335                 | 60.0                                   | 8             | 45               |

Note:  $\eta_{10}$  represents the overpotential at 10 mA cm<sup>-2</sup>.

**Table S5.** The mass activities of the as-obtained electrocatalysts for OER.

| Catalysts                            | Electrolyte      | $\eta_{10}$ (mV) | Mass activities (mA mg <sup>-1</sup> )    |
|--------------------------------------|------------------|------------------|-------------------------------------------|
| NS                                   | 1.0 M KOH        | 333              | 0.94 ( $\eta = 0.27$ V)                   |
| F-NS                                 | 1.0 M KOH        | 244              | 7.72 ( $\eta = 0.27$ V)                   |
| C <sub>2</sub> F <sub>8</sub> -NS    | 1.0 M KOH        | 181              | 18.48 ( $\eta = 0.27$ V)                  |
| <b>C<sub>5</sub>F<sub>5</sub>-NS</b> | <b>1.0 M KOH</b> | <b>146</b>       | <b>21.79 (<math>\eta = 0.27</math> V)</b> |
| C <sub>8</sub> F <sub>2</sub> -NS    | 1.0 M KOH        | 216              | 8.61 ( $\eta = 0.27$ V)                   |
| C-NS                                 | 1.0 M KOH        | 257              | 4.92 ( $\eta = 0.27$ V)                   |

## References

1. M. B. Z. Hegazy, M. R. Berber, Y. Yamauchi, A. Pakdel, R. Cao and U. P. Apfel, *ACS Appl. Mater. Interfaces*, 2021, **13**, 34043-34052.
2. C. C. McCrory, S. Jung, J. C. Peters and T. F. Jaramillo, *J. Am. Chem. Soc.*, 2013, **135**, 16977-16987.
3. W. Gao, M. Yan, H. Y. Cheung, Z. Xia, X. Zhou, Y. Qin, C. Y. Wong, J. C. Ho, C. R. Chang and Y. Qu, *Nano Energy*, 2017, **38**, 290-296.
4. Z. Yin, R. He, Y. Zhang, L. Feng, X. Wu, T. Wågberg and G. Hu, *J. Energy Chem.*, 2022, **69**, 585-592.
5. W. Cheng, Z. P. Wu, D. Luan, S. Q. Zang and X. W. D. Lou, *Angew Chem. Int. Edit.*, 2021, **60**, 26397-26402.
6. J. Li, P. Liu, J. Mao, J. Yan and W. Song, *J. Mater. Chem. A*, 2021, **9**, 11248-11254.
7. Z. Zou, M. Cai, X. Zhao, J. Huang, J. Du and C. Xu, *J. Mater. Chem. A*, 2019, **7**, 14011-14018.
8. Z. Wang, J. Zhang, Q. Yu, H. Yang, X. Chen, X. Yuan, K. Huang and X. Xiong, *Chem. Eng. J.*, 2021, **410**, 128366.
9. A. C. Pebley, E. Decolvenaere, T. M. Pollock and M. J. Gordon, *Nanoscale*, 2017, **9**, 15070-15082.
10. Z. Gao, Z. Yu, Y. Huang, X. He, X. Su, L. Xiao, Y. Yu, X. Huang and F. Luo, *J. Mater. Chem. A*, 2020, **8**, 5907-5912.
11. J. Xu, Y. Liu, J. Li, I. Amorim, B. Zhang, D. Xiong, N. Zhang, S. M. Thalluri, J. P. S. Sousa and L. Liu, *J. Mater. Chem. A*, 2018, **6**, 20646-20652.
12. J. Wang, J. Liu, B. Zhang, H. Wan, Z. Li, X. Ji, K. Xu, C. Chen, D. Zha, L. Miao and J. Jiang, *Nano Energy*, 2017, **42**, 98-105.
13. J. Jia, L. Li, X. Lian, M. Wu, F. Zheng, L. Song, G. Hu and H. Niu, *Nanoscale*, 2021, **13**, 11120-11127.
14. K. L. Nardi, N. Yang, C. F. Dickens, A. L. Strickler and S. F. Bent, *Adv. Energy Mater.*, 2015, **5**, 1500412.

15. H. Jin, S. Mao, G. Zhan, F. Xu, X. Bao and Y. Wang, *J. Mater. Chem. A*, 2017, **5**, 1078-1084.
16. T. Bhowmik, M. K. Kundu and S. Barman, *ACS Appl. Energy Mater.*, 2018, **1**, 1200-1209.
17. K. S. Joya, M. A. Ehsan, N. U. A. Babar, M. Sohail and Z. H. Yamani, *J. Mater. Chem. A*, 2019, **7**, 9137-9144.
18. J. Xie, X. Zhang, H. Zhang, J. Zhang, S. Li, R. Wang, B. Pan and Y. Xie, *Adv. Mater.*, 2017, **29**, 1604765.
19. S. Battiato, M. Urso, S. Cosentino, A. L. Pellegrino, S. Mirabella and A. Terrasi, *Nanomaterials-Basel*, 2021, **11**, 3010.
20. Q. Xu, M. Chu, M. Liu, J. Zhang, H. Jiang and C. Li, *Chem. Eng. J.*, 2021, **411**, 128488.
21. A. Goswami, D. Ghosh, V. V. Chernyshev, A. Dey, D. Pradhan and K. Biradha, *ACS Appl. Mater. Interfaces*, 2020, **12**, 33679-33689.
22. J. Wu, P. Li, A. Parra-Puerto, S. Wu, X. Lin, D. Kramer, S. Chen and A. Kucernak, *ACS Appl. Mater. Interfaces*, 2020, **12**, 47397-47407.
23. M. Govindhan, B. Mao and A. Chen, *Nanoscale*, 2016, **8**, 1485-1492.
24. K. He, Z. Cao, R. Liu, Y. Miao, H. Ma and Y. Ding, *Nano Research*, 2016, **9**, 1856-1865.
25. Z. Y. Wu, Q. X. Zhang, L. J. Huang, Y. J. Xu and D. L. Tang, *J. Power Sources*, 2021, **488**, 229448.
26. H. Zeng, M. h. Oubla, X. Zhong, N. Alonso Vante, F. Du, Y. Xie, Y. Huang and J. Ma, *Appl. Catal. B Environ.*, 2021, **281**, 119535.
27. E. Saha, K. Karthick, S. Kundu and J. Mitra, *J. Mater. Chem. A*, 2021, **9**, 26800-26809.
28. D. Zhang, H. Mou, F. Lu, C. Song and D. Wang, *Appl. Catal. B Environ.*, 2019, **254**, 471-478.
29. K. Pan, Y. Zhai, J. Zhang and K. Yu, *Materials*, 2019, **12**, 3364.
30. K. Hu, M. Wu, S. Hinokuma, T. Ohto, M. Wakisaka, J. Fujita and Y. Ito, *J. Mater. Chem. A*, 2019, **7**, 2156-2164.
31. S. Huang, Y. Meng, S. He, A. Goswami, Q. Wu, J. Li, S. Tong, T. Asefa and M. Wu, *Adv. Funct. Mater.*, 2017, **27**, 1606585.
32. T. L. Luyen Doan, D. T. Tran, D. C. Nguyen, H. Tuan Le, N. H. Kim and J. H. Lee, *Appl. Catal. B Environ.*, 2020, **261**, 118268.
33. B. Wu, H. Qian, Z. Nie, Z. Luo, Z. Wu, P. Liu, H. He, J. Wu, S. Chen and F. Zhang, *J. Energy Chem.*, 2020, **46**, 178-186.
34. T. A. Ho, C. Bae, H. Nam, E. Kim, S. Y. Lee, J. H. Park and H. Shin, *ACS Appl. Mater. Interfaces*, 2018, **10**, 12807-12815.
35. L. Li, C. Sun, B. Shang, Q. Li, J. Lei, N. Li and F. Pan, *J. Mater. Chem. A*, 2019, **7**, 18003-18011.
36. H. Sun, Z. Ma, Y. Qiu, H. Liu and G. G. Gao, *Small*, 2018, **14**, 1800294.
37. J. Lin, P. Wang, H. Wang, C. Li, X. Si, J. Qi, J. Cao, Z. Zhong, W. Fei and J. Feng, *Adv. Sci.*, 2019, **6**, 1900246.
38. G. Song, Z. Wang, J. Sun, J. Sun, D. Yuan and L. Zhang, *Electrochem.*

- Commun.*, 2019, **105**, 106487.
39. Q. Qin, L. Chen, T. Wei and X. Liu, *Small*, 2019, **15**, 1803639.
  40. Q. Liang, H. Jin, Z. Wang, Y. Xiong, S. Yuan, X. Zeng, D. He and S. Mu, *Nano Energy*, 2019, **57**, 746-752.
  41. J. Chang, Q. Lv, G. Li, J. Ge, C. Liu and W. Xing, *Appl. Catal. B Environ.*, 2017, **204**, 486-496.
  42. S. Chen, Z. Kang, X. Zhang, J. Xie, H. Wang, W. Shao, X. Zheng, W. Yan, B. Pan and Y. Xie, *ACS Cent. Sci.*, 2017, **3**, 1221-1227.
  43. M. Arif, G. Yasin, M. Shakeel, M. A. Mushtaq, W. Ye, X. Fang, S. Ji and D. Yan, *J. Energy. Chem.*, 2021, **58**, 237-246.
  44. C. Liu, A. M. Geer, C. Webber, C. B. Musgrave, S. Gu, G. Johnson, D. A. Dickie, S. Chhabra, A. Schnegg, H. Zhou, C.-J. Sun, S. Hwang, W. A. Goddard, S. Zhang and T. B. Gunnoe, *ACS Catal.*, 2021, **11**, 15068-15082.
  45. L. Yao, N. Zhang, Y. Wang, Y. Ni, D. Yan and C. Hu, *J. Power Sources*, 2018, **374**, 142-148.
